# Supplementary material for: Culturally responsive leadership: a critical analysis of one school district’s five-year plan
Source: Frontiers journal article supplement (doi:10.3389/feduc.2024.1385788), 2024-04-05
Supplement: Table_1.pdf [file Table_1.pdf]

## *Supplementary Material*

**Table 1. The Multiple Dimensions of Culturally-Responsive Leadership With Full Reference List**

| <b>Concepts</b>                          | <b>CRSL</b> | <b>C RTP</b> | <b>SV</b> | <b>References</b>                                                                                                                                                                                                                                                                                                                                                                                                          |
|------------------------------------------|-------------|--------------|-----------|----------------------------------------------------------------------------------------------------------------------------------------------------------------------------------------------------------------------------------------------------------------------------------------------------------------------------------------------------------------------------------------------------------------------------|
| Self-awareness of own culture & biases   | x           | x            | x         | Brown, et al. (2022); DeMatthews (2018); Gay, (2000); Harmon (2012); Ishimaru (2022); Khalifa (2018); Khalifa, et al. (2016); Mansfield, et al. (2012); Mansfield & Jean-Marie (2015); Mansfield & Lambrinou (2022); Radd, et al. (2021); Rodela & Bertrand (2018); Santamaria (2014)                                                                                                                                      |
| Knowledge & cultural competence          | x           | x            | x         | Gay (2000); Ishimaru (2022); Johnson (2007, 2014); Khalifa (2018); Lac & Mansfield (2018); Mansfield, et al. (2012); Mansfield & Jean-Marie (2015); Mansfield & Lambrinou (2022); Radd, et al. (2021); Rodela & Bertrand (2018); Will & Najarro (2022); Santamaria (2014); Yosso (2005)                                                                                                                                    |
| Respect for diversity; intersectionality | x           | x            | x         | Bishton & Lindsay (2011); DeMatthews (2018); Fernández & Paredes-Scribner (2018); Gay, (2000); Ishimaru (2022); Johnson (2007, 2014); Khalifa (2018); Khalifa, et al. (2016); Lac & Mansfield (2018); Mansfield (2015a); Mansfield, et al. (2012); Mansfield & Jean-Marie (2015); Mansfield & Lambrinou (2022); Newcomb & Mansfield (2014); Radd, et al. (2021); Rodela & Bertrand (2018); Santamaria (2014); Yosso (2005) |
| Critical consciousness                   | x           | x            | x         | Brock (2003); Jackson, 2022; Jackson, 2020; Johnson (2007, 2014); Khalifa (2018); Lac & Mansfield (2018); Mansfield, et al. (2012); Mansfield & Lambrinou (2022); Radd, et al. (2021); Tuck & Yang (2014)                                                                                                                                                                                                                  |
| Equity & social justice focus            | x           | x            | x         | Bishton & Lindsay (2011); Gay, (2000); DeMatthews (2018); Ishimaru (2022); Johnson (2007, 2014); Khalifa (2018); Khalifa, et al. (2016); Lac & Mansfield (2018); Mansfield (2015a); Mansfield, et al. (2012); Mansfield & Jean-Marie (2015); Mansfield & Lambrinou (2022); Newcomb & Mansfield (2014); Radd, et al. (2021); Rodela & Bertrand (2018); Santamaria (2014); Sargeant & Gillet-Swan (2015)                     |
| Action/change oriented; intentionality   | x           | x            | x         | Beattie (2012); Brock (2003); Ishimaru (2022); Jackson (2022); Johnson (2007, 2014); Khalifa (2018); Khalifa, et al. (2016); Lac & Mansfield (2018); Lundy (2007); Lundy (2007); Mansfield, et al. (2012); Mansfield & Lambrinou (2022); Mitra (2008); Mitra & Serriere (2015); Mullis (2011); Radd, et al. (2021); Tuck & Yang (2014); Welton & Freelon (2018); Will & Najarro (2022)                                     |
| Language & communication                 | x           | x            | x         | Fernández & Paredes-Scribner (2018); Howard, G.R. (2007); Howard, T.C. (2021); Johnson (2014); Lubelfeld, et al. (2018); Ishimaru (2022); Mansfield                                                                                                                                                                                                                                                                        |

|                                          |   |   |   |                                                                                                                                                                                                                                                                                                                                                                                                                                                            |
|------------------------------------------|---|---|---|------------------------------------------------------------------------------------------------------------------------------------------------------------------------------------------------------------------------------------------------------------------------------------------------------------------------------------------------------------------------------------------------------------------------------------------------------------|
|                                          |   |   |   | (2014); Mansfield, et al. (2012); Mansfield & Jean-Marie (2015); Mitra (2008); Mullis (2011); Will & Najarro (2022); Yosso (2005)                                                                                                                                                                                                                                                                                                                          |
| Develop/improve relationships            | x | x | x | DeMatthews (2018); Fernández & Paredes-Scribner (2018); Howard, G.R. (2007); Ishimaru (2022); Khalifa (2018); Lac & Mansfield (2018); Mansfield (2014); Mansfield, et al. (2012); Mitra & Gross (2009); Mitra & Serriere (2015); Mullis (2011); Newcomb & Mansfield (2014)                                                                                                                                                                                 |
| Collaboration & partnership              | x | x | x | Brasof (2015); Brown, et al. (2022); DeMatthews (2018); Fernández & Paredes-Scribner (2018); Harmon (2012); Ishimaru (2022); Jackson (2022); Jackson, (2020); Johnson (2007); Khalifa (2018); Lubelfeld, et al. (2018); Mansfield, et al. (2012); Mansfield & Lambrinou (2022); Mitra (2008); Mitra & Gross (2009); Mitra & Serriere (2015); Waters (2011)                                                                                                 |
| Shared power, decision-making, vision    |   |   | x | Beattie (2012); Brasof, 2015; Brown, et al. (2022); Fernández & Paredes-Scribner (2018); Jackson, 2022; Johnson (2007); Lac & Mansfield (2018); Lubelfeld, et al. (2018); Mansfield, et al. (2012); Mitra (2008); Mitra & Gross (2009); Mitra & Serriere (2015); Mullis (2011); Nelson (2018); Rodela & Bertrand (2018); Sargeant & Gillet-Swan (2015); Smyth (2006); Taylor & Robinson (2009); Tuck & Yang (2014); Waters (2011); Welton & Freelon (2018) |
| Capacity-building, self-efficacy, agency |   |   | x | Brasof, 2015; Brown, et al. (2022); Fielding (2001, 2011); Jackson (2022); Jackson (2020); Mansfield (2015a); Mansfield & Lambrinou (2022); Mitra (2006, 2008, 2009); Mitra & Serriere (2015); Mullis (2011); Smith (2020); Smyth (2006); Waters (2011)                                                                                                                                                                                                    |
| High expectations for students           | x | x | x | Johnson (2007, 2014); Khalifa (2018); Mansfield (2014); Mansfield & Lambrinou (2022); Radd, et al. (2021); Smith (2020); Tuck & Yang (2014); Waters (2011); Will & Najarro (2022)                                                                                                                                                                                                                                                                          |
| Student-centered learning                |   | x | x | Beattie (2012); Bishton & Lindsay (2011); Gay, (2000); Harmon (2012); Jackson (2022); Jackson (2020); Johnson (2014); Lac & Mansfield (2018); Lubelfeld, et al. (2018); Lundy (2007); Mansfield (2015a); Mitra (2008); Mitra & Serriere (2015); Mullis (2011); Smith (2020); Smyth (2006); Tuck & Yang (2014); Waters (2011)                                                                                                                               |
| Inclusive, culturally relevant content   | x | x | x | Bishton & Lindsay (2011); Gay, (2000); Harmon (2012); Jackson, 2020; Johnson (2014); Khalifa (2018); Will & Najarro (2022); Lac & Mansfield (2018); Mansfield & Lambrinou (2022); NPBEA. (n.d.); Radd, et al. (2021); Smith (2020); Tuck & Yang (2014); Yosso (2005)                                                                                                                                                                                       |
| Critique neoliberal reforms              |   |   | x | Bourke, & Loveridge (2018); Brasof, 2015; Lac & Mansfield (2018); Leonardo, (2007); Welton & Freelon (2018); Smith (2020); Smyth (2006); Wood, Taylor, & Atkins (2018)                                                                                                                                                                                                                                                                                     |

|                                                                    |   |   |   |                                                                                                                                                                                                                                                                                                                                        |
|--------------------------------------------------------------------|---|---|---|----------------------------------------------------------------------------------------------------------------------------------------------------------------------------------------------------------------------------------------------------------------------------------------------------------------------------------------|
| Stress democratic schools; engaged citizenry                       |   |   | x | Brasof (2015); Cook-Sather (2007); Connor (2020); Fielding (2001, 2004; 2011); Gartrell (2012); Johnson (2014); Johnson (2014); Lac & Mansfield (2018); Mansfield, et al. (2012); Mansfield & Lambrinou (2022); Mitra (2008); Mitra & Gross (2009); Mitra & Serriere (2015); Smith (2020); Smyth (2006); Wood, Taylor, & Atkins (2018) |
| Constructivist view of teaching and learning                       |   | x | x | Johnson (2014); Lac & Mansfield (2018); Smith (2020)                                                                                                                                                                                                                                                                                   |
| Constructivist view of leadership                                  | x | x | x | Lac & Mansfield (2018)                                                                                                                                                                                                                                                                                                                 |
| Leaders must create new organizational structures, roles, routines | x | x | x | Johnson (2014); Lac & Mansfield (2018); Radd, et al. (2021)                                                                                                                                                                                                                                                                            |

## References

- Beattie, H. (2012). Amplifying student voice: The missing link in school transformation. *Management in Education*, 26(3), 158-160.
- Bishton, H. & Lindsay, G. (2011). "What about what I think of school?" — Student voice in special and inclusive education: A practitioner and personal response. In G. Czerniawski, G. & W. Kidd *The student voice handbook: Bridging the academic/practitioner divide* (pp. 169-183). Emerald Publishing.
- Brasof, M. (2015). *Student voice and school governance: Distributing leadership to youth and adults*. Routledge.
- Bourke, R. & Loveridge, J. (2018). Students' voice shifting the gaze from measured learning to the point of learning. In R. Bourke & J. Loveridge *Radical collegiality through student voice: Educational experience, policy and practice* (pp. 143-157). Springer.
- Brock, R. (2003). The theory and practice of my pedagogy. *Taboo*, 7(1), 61-76.
- Brown, L.M., Biddle, C., & Tappan, M. (2022). *Trauma-responsive schooling: Centering student voice and healing*. Harvard Education Press.
- Cook-Sather, A. (2007). What would happen if we treated students as those with opinions that matter? The benefits to principals and teachers of supporting youth engagement in school. *NASSP Bulletin*, 91, 343-362.
- Connor, J. (2020). Cultivating participatory habits and civic responsibility: The far-reaching value of student voice. *Green Schools Catalyst Quarterly* (7), 1, 30-43.

- DeMatthews, D.E. (2018). *Community engaged leadership for social justice: A critical approach in urban schools*. Routledge.
- Fernández, E. & Paredes-Scribner, S.M. (2018). “Venimos para que se oiga la voz”: Activating community cultural wealth as parental educational leadership. *Journal of Research on Leadership Education*, 13(1), 59-78.
- Fielding, M. (2011). Student voice and the possibility of a radical democratic education. In W. Kidd & G. Czerniawski (Eds) *Student voice handbook: Bridging the academic/practitioner divide* (pp. 3-18). Emerald.
- Fielding, M. (2004). “New Wave” student voice and the renewal of civic society. *London Review of Education*, 2(3), 197-217.
- Fielding, M. (2001). Students as radical agents of change. *Journal of Educational Change*, 2, 123-141.
- Gay, G. (2000). *Culturally responsive teaching theory, research, and practice*. New York, NY: Teachers College.
- Gartrell, D. (2012). *Education for a civil society: How guidance teaches young children democratic skills*. National Association for the Education of Young Children.
- Ginwright, S., & Cammarota, J. (2006). Introduction. In S. Ginwright, J. Cammarota, & P. Noguera (Eds.), *Beyond resistance! Youth activism and community change* (pp. xiii-xxii). New York, NY: Taylor & Francis Group.
- Giroux, H. A. (2003). *The abandoned generation: Democracy beyond the culture of fear*. Palgrave-MacMillan.
- Giroux, H. (1986). Radical pedagogy and the politics of student voice. *Interchange*, 17(1), 48-69.
- Harmon D.A., (2012). Culturally responsive teaching through a historical lens: will history repeat itself? *Interdisciplinary Journal of Teaching and Learning*, 2(2), 13-22.
- Howard, G. R. (2007). As diversity grows, so must we. *Educational Leadership*, 64(4), 16-22.
- Howard, T.C. (2021). Culturally responsive pedagogy. In J.A. Banks (Ed.) *Transforming multicultural education policy and practice: Expanding educational opportunity*. Teachers College Press.
- Ishimaru, A.M. (2022). *Just schools: Building equitable collaborations with families and communities*. Teachers College Press.
- Jackson, D. (2022). Making sense of Black students’ figured worlds of race, racism, anti-blackness, and blackness. *Research in the Teaching of English*, 57(1), 43-66.
- Jackson, D. (2020). Relationship building in a Black space: Partnering in solidarity. *Journal of Literacy Research*, 52(4), 432-455.
- Johnson, L. (2014). Culturally responsive leadership for community empowerment. *Multicultural Education Review*, 6(2), 145-170.

- Johnson, L. (2007). Rethinking successful school leadership in challenging U.S. schools: Culturally responsive practices in school-community relationships. *International Studies in Educational Administration*, 35(3), 49-57.
- Khalifa, M. (2018). *Culturally responsive school leadership*. Harvard Education Press.
- Khalifa, M.A., Gooden, M.A., & Davis, J.E. (2016). Culturally responsive school leadership: A synthesis of the literature. *Review of Educational Research*, 86(4), 1272–1311.
- Lac, V.T. & Mansfield, K.C. (2018). What do students have to do with educational leadership?: Making a case for centering student voice. *Journal of Research on Leadership Education*, 13(1), 38-58. <https://doi.org/10.1177/1942775117743748>
- Ladd, S., Generett, G.G., Gooden, M.A., Theoharis, G. (2021). *Five practices for equity-focused school leadership*. ASCD.
- Leonardo, Z. (2007). The war on schools: NCLB, nation creation, and the educational construction of whiteness. *Race Ethnicity and Education*, 10(3), 261-278.
- Lubelfeld, M., Polyak, N., & Caposey, P.J. (2018). *Student voice: From invisible to invaluable*. Rowan & Littlefield.
- Lundy, L. (2007). “Voice” is not enough: Conceptualising Article 12 of the United Nations Convention on the Rights of the Child. *British Educational Research Journal*, 33(6), 927-942.
- Mansfield, K.C. (2014). How listening to student voices can inform and strengthen social justice research and practice. *Educational Administration Quarterly*, 50(3), 392-430. DOI: 10.1177/0013161X13505288
- Mansfield, K.C. (2015a). The importance of safe space and student voice in schools that serve minoritized learners. *Journal of Educational Leadership, Policy and Practice*, 30(1), 25-38. [https://www.exeley.com/exeley/journals/journal\\_of\\_educational\\_leadership\\_policy\\_and\\_pract/30/1/pdf/10.21307\\_jelpp-2015-004.pdf](https://www.exeley.com/exeley/journals/journal_of_educational_leadership_policy_and_pract/30/1/pdf/10.21307_jelpp-2015-004.pdf)
- Mansfield, K.C. (2015b). Giftedness as property: Troubling whiteness, wealth, and gifted education in the US. *International Journal of Multicultural Education*, 17(1), 121-142. <https://doi.org/10.18251/ijme.v17i1.841>
- Mansfield, K.C. & Jean-Marie, G. (2015). Courageous conversations about race, class, and gender: Voices and lessons from the field. *International Journal of Qualitative Studies in Education*, 28(7), 819-841. DOI: 10.1080/09518398.2015.1036950
- Mansfield, K.C. & Lambrinou, M. (2022). “This is not who we are”: Students leading for anti-racist policy changes in Alexandria City Public Schools, Virginia. *Educational Policy*, 36(1), 19-56. <https://doi.org/10.1177/08959048211059>
- Mansfield, K.C., Rainbolt, S., & Fowler, E. (2018). Implementing restorative justice as a step toward racial equity in school discipline. *Teachers College Record*, 120(14), 1-24. <http://www.tcrecord.org/Content.asp?ContentId=22385>

- Mansfield, K.C., Welton, A., Halx, M.D. (2012). Listening to student voice: Toward a more inclusive theory for research and practice. In C. Boske & S. Diem (Eds.), *Global leadership for social justice: Taking it from field to practice* (pp. 21-41). United Kingdom: Emerald Publishing. [https://doi.org/10.1108/S1479-3660\(2012\)0000014006](https://doi.org/10.1108/S1479-3660(2012)0000014006)
- McLellan, R., Kirkman, R., Cartwright, S., & Millington, B. (2011). Student voice in the secondary school context: A case study of the benefits of schools, local authorities and higher education institutions working together. In G. Czerniawski, G. & W. Kidd *The student voice handbook: Bridging the academic/practitioner divide* (pp. 107-117). Emerald Publishing.
- Mitra, D. L. (2006). Youth as a bridge between home and school: Comparing student voice and parent involvement as strategies for change. *Education and Urban Society*, 38, 455-480.
- Mitra, D. L. (2008). *Student voice in school reform: Building youth-adult partnerships that strengthen schools and empower youth*. State University of New York Press.
- Mitra, D.L. and Gross, S.J. (2009) Increasing student voice in high school reform: Building partnerships, improving outcomes. *Educational Management Administration & Leadership*, 37, 522-543.
- Mitra, D. & Serriere, S.C. (2015). *Civic education in the elementary grades: Promoting student engagement in an era of accountability*. Teachers College Press.
- Mullis, G. (2011). Student voice: Changing practice and developing partnerships. In G. Czerniawski, G. & W. Kidd *The student voice handbook: Bridging the academic/practitioner divide* (pp. 209-224). Emerald Publishing. doi:10.1177/0013124506287911
- Nelson, E. (2018). Teachers and power in student voice: “Finger on the pulse, no children under the thumb.” In R. Bourke & J. Loveridge *Radical collegiality through student voice: Educational experience, policy and practice* (pp. 197-216). Springer.
- Newcomb, W.S. & Mansfield, K.C. (2014). Purposeful presence: Situating social justice in leadership education. *Scholar-Practitioner Quarterly*, 7 (3), 279-290.
- Radd, S., Gooden, M.A., Generett, G. G. & Theoharis, G. (2021). *Five practices for equity-focused school leadership*. ASCD.
- Rodella, K.C. & Bertrand, M. (2018). Rethinking educational leadership in the margins: Youth, parent, and community leadership for equity and social justice. *Journal of Research on Leadership Education*, 13(1), 3-9.
- Santamaría, L. J. (2014). Critical change for the greater good: Multicultural perceptions in educational leadership toward social justice and equity. *Educational Administration Quarterly*, 50, 347-391.
- Sargeant, J. & Gillett-Swan, J. K. (2015). Empowering the disempowered through voice-inclusive practice: Children’s views on adult-centric educational provision. *European Educational Research Journal*, 14(2), 177-191.

- Smith, A. A. (2020). *Investigating children's participation in decision making in New Zealand primary schools: Participation, pathways and potential*. Unpublished thesis submitted in partial fulfillment for the Doctor of Education in Te Kura Toi Tangata Faculty of Education, The University of Waikato.
- Taylor, C. & Robinson, C. (2009). Student voice: Theorising power and participation. *Pedagogy, Culture and Society*, 17(2), 7-21.
- Tuck, E. & Yang, K.W. (2014). *Youth resistance research and theories of change*. Routledge.
- Waters, M. (2011). Setting the learning agenda: Can pupils do that? In G. Czerniawski, G. & W. Kidd *The student voice handbook: Bridging the academic/practitioner divide* (pp. 199-207). Emerald Publishing.
- Will, M., & Najarro, I. (2022, April 18). What is culturally responsive teaching? *Education Week*. Retrieved May 6, 2023, from <https://www.edweek.org/teaching-learning/culturally-responsive-teaching-culturally-responsive-pedagogy/2022/04>
- Welton, A. D., & Freelon, R. (2018). Community Organizing as Educational Leadership: Lessons From Chicago on the Politics of Racial Justice. *Journal of Research on Leadership Education*, 13(1), 79-104.
- Wood, B., Taylor, R., & Atkins, R. (2018). Student voice, citizenship and regulated spaces. In R. Bourke & J. Loveridge (Eds) *Radical collegiality through student voice: Educational experience, policy and practice* (pp. 179-196). Springer.
- Yosso, T.J. (2005). Whose culture has capital? Race, *Ethnicity and Education*, 8(1), 69–91.

### **Author Contact Information**

Katherine Cumings Mansfield, Ph.D.  
 Professor & Mike Moses Endowed Chair in Educational Leadership  
 University of North Texas  
[katherine.mansfield@unt.edu](mailto:katherine.mansfield@unt.edu)

Marina Lambrinou, Ph.D.  
 Loyola University Maryland  
 Center for Equity, Leadership, and Social Justice in Education  
[mlambrinou@loyola.edu](mailto:mlambrinou@loyola.edu)
